# Supplementary material for: Uncertainties in Plant Species Niche Modelling Under Climate Change Scenarios
Source: Preprints.org preprint supplement (doi:10.20944/preprints202407.1186.v1), 2024-07-15
Supplement: Supplementary file 2 [file supplementary]

1. Abdelaal, M., Fois, M., Fenu, G., & Bacchetta, G. (2019). Using MaxEnt modeling to predict the potential distribution of the endemic plant *Rosa arabica* Crép. in Egypt. *Ecological Informatics*, *50*, 68–75. https://doi.org/10.1016/j.ecoinf.2019.01.003
2. Abrha, H., Birhane, E., Hagos, H., & Manaye, A. (2018). Predicting suitable habitats of endangered *Juniperus procera* tree under climate change in Northern Ethiopia. *Journal of Sustainable Forestry*, *37*(8), 842–853. https://doi.org/10.1080/10549811.2018.1494000
3. Akyol, A., & Örücü, Ö. K. (2019). Investigation and evaluation of stone pine (*Pinus pinea* L.) current and future potential distribution under climate change in Turkey. *Cerne*, *25*(4), 415–423. https://doi.org/10.1590/01047760201925042643
4. Bai, Y., Wei, X., & Li, X. (2018). Distributional dynamics of a vulnerable species in response to past and future climate change: A window for conservation prospects. *PeerJ*, *2018*(1). https://doi.org/10.7717/peerj.4287
5. Balima, L. H., Nacoulma, B. M. I., Da, S. S., Ouédraogo, A., Soro, D., & Thiombiano, A. (2022). Impacts of climate change on the geographic distribution of African oak tree (*Afzelia africana* Sm.) in Burkina Faso, West Africa. *Heliyon*, *8*(1). https://doi.org/10.1016/j.heliyon.2021.e08688
6. Bentley, L. K., Robertson, M. P., & Barker, N. P. (2019). Range contraction to a higher elevation: the likely future of the montane vegetation in South Africa and Lesotho. *Biodiversity and Conservation*, *28*(1), 131–153. https://doi.org/10.1007/s10531-018-1643-6
7. Canturk, U., & Kulaç, Ş. (2021). The effects of climate change scenarios on *Tilia* ssp. in Turkey. *Environmental Monitoring and Assessment*, *193*(12). https://doi.org/10.1007/s10661-021-09546-5
8. Erfanian, M. B., Sagharyan, M., Memariani, F., & Ejtehadi, H. (2021). Predicting range shifts of three endangered endemic plants of the Khorassan-Kopet Dagh floristic province under global change. *Scientific Reports*, *11*(1). https://doi.org/10.1038/s41598-021-88577-x
9. Fatemi, S. S., Rahimi, M., Tarkesh, M., & Ravanbakhsh, H. (2018). Predicting the impacts of climate change on the distribution of *Juniperus excelsa* M. Bieb. in the central and eastern ALBORZ mountains, IRAN. *IForest*, *11*(5), 643–650. https://doi.org/10.3832/ifor2559-011
10. Feng, L., Sun, J., Shi, Y., Wang, G., & Wang, T. (2020). Predicting suitable habitats of *Camptotheca acuminata* considering both climatic and soil variables. *Forests*, *11*(8). https://doi.org/10.3390/F11080891
11. Geng, W., Li, Y., Sun, D., Li, B., Zhang, P., Chang, H., Rong, T., Liu, Y., Shao, J., Liu, Z., Zhu, H., Lou, Y., Wang, Q., & Zhang, J. (2022). Prediction of the potential geographical distribution of *Betula platyphylla* Suk. in China under climate change scenarios. *PLoS ONE*, *17*(3 March). https://doi.org/10.1371/journal.pone.0262540
12. Gul Sarikaya, A., & Orucu, O. K. (2021). Maxent modeling for predicting the potential distribution of *Arbutus andrachne* L. belonging to climate change in Turkey. *Kuwait Journal of Science*, *48*(2), 1–15. https://doi.org/10.48129/kjs.v48i2.7882
13. Kaky, E., & Gilbert, F. (2019). Assessment of the extinction risks of medicinal plants in Egypt under climate change by integrating species distribution models and IUCN Red List criteria. *Journal of Arid Environments*, *170*. https://doi.org/10.1016/j.jaridenv.2019.05.016
14. Kamer Aksoy, Ö. (2022). Predicting the Potential Distribution Area of the *Platanus orientalis* L. in Turkey Today and in the Future. *Sustainability (Switzerland)*, *14*(18). https://doi.org/10.3390/su141811706
15. Kumar, D., Rawat, S., & Joshi, R. (2021). Predicting the current and future suitable habitat distribution of the medicinal tree *Oroxylum indicum* (L.) Kurz in India. *Journal of Applied Research on Medicinal and Aromatic Plants*, *23*. https://doi.org/10.1016/j.jarmap.2021.100309
16. Kumar, D., Singh, M., & Sharma, S. (2019). Fate of important medicinal plants in the eastern himalaya in changing climate scenarios: A case of *Panax pseudoginseng* wall. *Applied Ecology and Environmental Research*, *17*(6), 13493–13511. https://doi.org/10.15666/aeer/1706_1349313511
17. Kurpis, J., Serrato-Cruz, M. A., & Feria Arroyo, T. P. (2019). Modeling the effects of climate change on the distribution of *Tagetes lucida* Cav. (Asteraceae). *Global Ecology and Conservation*, *20*. https://doi.org/10.1016/j.gecco.2019.e00747
18. Liu, M. L., Sun, H. Y., Jiang, X., Zhou, T., Zhang, Q. J., Su, Z. D., Zhang, Y. N., Liu, J. N., & Li, Z. H. (2022). Simulation and Prediction of the Potential Geographical Distribution of *Acer cordatum* Pax in Different Climate Scenarios. *Forests*, *13*(9). https://doi.org/10.3390/f13091380
19. Li, Y., Li, M., Li, C., & Liu, Z. (2020). Optimized maxent model predictions of climate change impacts on the suitable distribution of *Cunninghamia lanceolata* in China. *Forests*, *11*(3). https://doi.org/10.3390/f11030302
20. Ma, B., & Sun, J. (2018). Predicting the distribution of *Stipa purpurea* across the Tibetan Plateau via the MaxEnt model. *BMC Ecology*, *18*(1). https://doi.org/10.1186/s12898-018-0165-0
21. Mahmoudi Shamsabad, M., Assadi, M., & Parducci, L. (2018). Impact of climate change implies the northward shift in distribution of the Irano-Turanian subalpine species complex *Acanthophyllum squarrosum*. *Journal of Asia-Pacific Biodiversity*, *11*(4), 566–572. https://doi.org/10.1016/j.japb.2018.08.009
22. Naghipour, A. A., Teimoori Asl, S., Ashrafzadeh, M. R., & Haidarian, M. (. (2021). Predicting the Potential Distribution of *Crataegus azarolus* L. under Climate Change in Central Zagros. *Journal of Wildlife and Biodiversity*. https://doi.org/10.22120/jwb.2021.530532.1229
23. Naudiyal, N., Wang, J., Ning, W., Gaire, N. P., Peili, S., Yanqiang, W., Jiali, H., & Ning, S. (2021). Potential distribution of Abies, Picea, and Juniperus species in the sub-alpine forest of Minjiang headwater region under current and future climate scenarios and its implications on ecosystem services supply. *Ecological Indicators*, *121*. https://doi.org/10.1016/j.ecolind.2020.107131
24. Niskanen, A. K. J., Niittynen, P., Aalto, J., Väre, H., & Luoto, M. (2019). Lost at high latitudes: Arctic and endemic plants under threat as climate warms. *Diversity and Distributions*, *25*(5), 809–821. https://doi.org/10.1111/ddi.12889
25. Ouyang, X., Bai, S., Strachan, G. B., & Chen, A. (2022). Simulation of the potential distribution of rare and endangered *Satyrium* species in China under climate change. *Ecology and Evolution*, *12*(7). https://doi.org/10.1002/ece3.9054
26. Oyebanji, O. O., Salako, G., Nneji, L. M., Oladipo, S. O., Bolarinwa, K. A., Chukwuma, E. C., Ayoola, A. O., Olagunju, T. E., Ighodalo, D. J., & Nneji, I. C. (2021). Impact of climate change on the spatial distribution of endemic legume species of the Guineo-Congolian forest, Africa. *Ecological Indicators*, *122*. https://doi.org/10.1016/j.ecolind.2020.107282
27. Purohit, S., & Rawat, N. (2022). MaxEnt modeling to predict the current and future distribution of Clerodendrum infortunatum L. under climate change scenarios in Dehradun district, India. *Modeling Earth Systems and Environment*, *8*(2), 2051–2063. https://doi.org/10.1007/s40808-021-01205-5
28. Ramírez-Rodríguez, R., Melendo-Luque, M., Rus-Moreno, J. D., & Amich, F. (2021). Potential changes in the distribution of *Delphinium bolosii* and related taxa of the series Fissa from the Iberian Peninsula under future climate change scenarios. *Nature Conservation*, *43*, 147–166. https://doi.org/10.3897/natureconservation.43.63876
29. Rawat, N., Purohit, S., Painuly, V., Negi, G. S., & Bisht, M. P. S. (2022). Habitat distribution modeling of endangered medicinal plant *Picrorhiza kurroa* (Royle ex Benth) under climate change scenarios in Uttarakhand Himalaya, India. *Ecological Informatics*, *68*. https://doi.org/10.1016/j.ecoinf.2021.101550
30. Sari, İ., & Kandemir, A. (2020). Will ferulago glareosa kandemir and hedge (Apiaceae) be extinct in the near future? *Turkish Journal of Botany*, *44*(4), 427–440. https://doi.org/10.3906/bot-2001-33
31. Seda, E., Ömer, K., & Author Arslan, C. (2019). Present and future potential distribution of the *Pinus nigra* Arnold and *Pinus sylvestris* L. using MaxEnt model. *International Journal of Ecosystems and Ecology Science (IJEES)*, *9*(4), 787–798. https://doi.org/10.31407/ijees
32. Shankhwar, R., Bhandari, M. S., Meena, R. K., Shekhar, C., Pandey, V. V., Saxena, J., Kant, R., Barthwal, S., Naithani, H. B., Pandey, S., Pandey, A., & Ginwal, H. S. (2019). Potential eco-distribution mapping of *Myrica esculenta* in northwestern Himalayas. *Ecological Engineering*, *128*, 98–111. https://doi.org/10.1016/j.ecoleng.2019.01.003
33. Shi, N., Naudiyal, N., Wang, J., Gaire, N. P., Wu, Y., Wei, Y., He, J., & Wang, C. (2022). Assessing the Impact of Climate Change on Potential Distribution of *Meconopsis punicea* and Its Influence on Ecosystem Services Supply in the Southeastern Margin of Qinghai-Tibet Plateau. *Frontiers in Plant Science*, *12*. https://doi.org/10.3389/fpls.2021.830119
34. Shrestha, B., Tsiftsis, S., Chapagain, D. J., Khadka, C., Bhattarai, P., Shrestha, N. K., Kolanowska, M. A., & Kindlmann, P. (2021). Suitability of habitats in nepal for *dactylorhiza hatagirea* now and under predicted future changes in climate. *Plants*, *10*(3), 1–21. https://doi.org/10.3390/plants10030467
35. Sifuentes, J. Á. M., Puga, N. D., Corral, J. A. R., Eguiarte, D. R. G., & Munguía, S. M. (2020). Environmental suitability areas for [*Bouteloua curtipendula* (Michx.) Torr.] in Mexico due to climate change effect. *Revista Mexicana De Ciencias Pecuarias*, *11*, 49–62. <https://doi.org/10.22319/RMCP.V11S2.4693>
36. Singh, L., Kanwar, N., Bhatt, I. D., Nandi, S. K., & Bisht, A. K. (2022). Predicting the potential distribution of *Dactylorhiza hatagirea* (D. Don) Soo-an important medicinal orchid in the West Himalaya, under multiple climate change scenarios. *PLoS ONE*, *17*(6 June). https://doi.org/10.1371/journal.pone.0269673
37. Sofi, I. I., Verma, S., Charles, B., Ganie, A. H., Sharma, N., & Shah, M. A. (2022). Predicting distribution and range dynamics of *Trillium govanianum* under climate change and growing human footprint for targeted conservation. *Plant Ecology*, *223*(1), 53–69. https://doi.org/10.1007/s11258-021-01189-3
38. Wang, J., Qian, Q., Zhang, F., Jia, X. J., & He, J. (2022). The possible future changes in potential suitable habitats of *Tetrastigma hemsleyanum* (Vitaceae) in China predicted by an ensemble model. *Global Ecology and Conservation*, *35*. https://doi.org/10.1016/j.gecco.2022.e02083
39. Wan, J. N., Mbari, N. J., Wang, S. W., Liu, B., Mwangi, B. N., Rasoarahona, J. R. E., Xin, H. P., Zhou, Y. D., & Wang, Q. F. (2021). Modeling impacts of climate change on the potential distribution of six endemic baobab species in Madagascar. *Plant Diversity*, *43*(2), 117–124. https://doi.org/10.1016/j.pld.2020.07.001
40. Wouyou, H. G., Lokonon, B. E., Idohou, R., Zossou-Akete, A. G., Assogbadjo, A. E., & Glèlè Kakaï, R. (2022). Predicting the potential impacts of climate change on the endangered *Caesalpinia bonduc* (L.) Roxb in Benin (West Africa). *Heliyon*, *8*(3). https://doi.org/10.1016/j.heliyon.2022.e09022
41. Xiao, J., Eziz, A., Zhang, H., Wang, Z., Tang, Z., & Fang, J. (2019). Responses of four dominant dryland plant species to climate change in the Junggar Basin, northwest China. *Ecology and Evolution*, *9*(23), 13596–13607. https://doi.org/10.1002/ece3.5817
42. Xu, W., Zhu, S., Yang, T., Cheng, J., & Jin, J. (2022). Maximum Entropy Niche-Based Modeling for Predicting the Potential Suitable Habitats of a Traditional Medicinal Plant (*Rheum nanum*) in Asia under Climate Change Conditions. *Agriculture (Switzerland)*, *12*(5). https://doi.org/10.3390/agriculture12050610
43. Yadav, S., Bhattacharya, P., Areendran, G., Sahana, M., Raj, K., & Sajjad, H. (2022). Predicting impact of climate change on geographical distribution of major NTFP species in the Central India Region. *Modeling Earth Systems and Environment*, *8*(1), 449–468. https://doi.org/10.1007/s40808-020-01074-4
44. Yan, D., Chen, W., Liu, L., Li, J., Liu, L., & Wang, Y. (2018). Change in current and future geographic distributions of Ulmus lamellosa in China. *Journal of Forestry Research*, *29*(4), 1147–1156. https://doi.org/10.1007/s11676-017-0503-7
45. Yan, X., Wang, S., Duan, Y., Han, J., Huang, D., & Zhou, J. (2021). Current and future distribution of the deciduous shrub *Hydrangea macrophylla* in China estimated by MaxEnt. *Ecology and Evolution*, *11*(22), 16099–16112. https://doi.org/10.1002/ece3.8288
46. Ye, X. Z., Zhao, G. hua, Zhang, M. zhu, Cui, X. yue, Fan, H. yua, & Liu, B. (2020). Distribution pattern of endangered plant *Semiliquidambar cathayensis* (Hamamelidaceae) in response to climate change after the last interglacial period. *Forests*, *11*(4). https://doi.org/10.3390/F11040434
47. Zhang, H., & Zhao, H. (2021). Study on rare and endangered plants under climate: Maxent modeling for identifying hot spots in northwest China. *Cerne*, *27*(1). https://doi.org/10.1590/01047760202127012667
48. Zhao, Q., Zhang, Y., Li, W. N., Hu, B. W., Zou, J. Bin, Wang, S. Q., Niu, J. F., & Wang, Z. Z. (2021). Predicting the potential distribution of perennial plant *Coptis chinensis* franch. In china under multiple climate change scenarios. *Forests*, *12*(11). https://doi.org/10.3390/f12111464
